# Supplementary material for: The structure–activity correlation of bifunctional MnO2 polymorphoric and MoS2-based heterostructures: a highly efficient, robust electrochemical water oxidation and reduction reaction catalyst in alkaline pH
Source: Royal Society of Chemistry journal article supplement (doi:10.1039/d0se01714k), 2021-01-01
Supplement: d0se01714k1.pdf [file d0se01714k1.pdf]

## **Supporting Information**

### **Structure-Activity Correlation of Bifunctional MnO<sub>2</sub> polymorphoric and MoS<sub>2</sub> based Heterostructures: A Highly efficient, Robust Electrochemical Water Oxidation and Reduction Reaction Catalyst in Alkaline pH**

Saikat Bolar,<sup>ab</sup> Subhasis Shit,<sup>ab</sup> Prakas Samanta,<sup>ab</sup> Naresh Chandra Murmu,<sup>ab</sup> Tapas Kuila,<sup>\*ab</sup>

<sup>a</sup> Surface Engineering & Tribology Division, Council of Scientific and Industrial Research-  
Central Mechanical Engineering Research Institute, Durgapur -713209, India

<sup>b</sup> Academy of Scientific and Innovative Research (AcSIR), Ghaziabad- 201002, India

*\*Correspondence to Tapas Kuila (+91-9647205077; Fax: +91-343-2548204, E-mail: [tkuila@gmail.com](mailto:tkuila@gmail.com))*

### **Experimental Section:**

#### **Materials**

Potassium permanganate (KMnO<sub>4</sub>), manganese sulfate (MnSO<sub>4</sub>), N, N-dimethyl formamide (DMF), 99% ethanol and hydrochloric acid (HCl) were obtained from Merck Specialities Private Limited (Mumbai, India). Ammonium persulphate ((NH<sub>4</sub>)<sub>2</sub>S<sub>2</sub>O<sub>8</sub>) and Graphite rod were purchased from Sigma Aldrich, India. PVDF (polyvinylidene fluoride) and conducting carbon black were procured from Akzo Nobel Amides Co., Ltd. (Kyungpuk, South Korea). Sodium molybdate tetrahydrate ((NH<sub>4</sub>)<sub>6</sub>Mo<sub>7</sub>O<sub>24</sub>.4H<sub>2</sub>O) and Thioacetamide [CS(NH<sub>2</sub>)<sub>2</sub>] were purchased from Alfa.

#### **Synthesis of Electrode Materials:**

Different crystal phase of MnO<sub>2</sub> was synthesized by hydrothermal method with the variation of reaction temperature and precursor amount [1]. Typically ~2g of KMnO<sub>4</sub> and ~0.4g of MnSO<sub>4</sub>.4H<sub>2</sub>O were dissolved in 85 ml of deionized (DI) water with continuous stirring.

About 5.5 ml of 1M HCl was added into the solution. The resulting solution was poured into a 100 ml of Teflon-lined stainless steel autoclave and kept inside a hot air oven at 180 °C for 24 h. The obtained product was collected through filtration and washing with DI water and ethanol for several times. The product was dried at ~60 °C and calcined at 350 °C for 2 h. The product was collected and labelled as  $\alpha$ -MnO<sub>2</sub>.  $\beta$ -MnO<sub>2</sub> was prepared by solvothermal treatment of the solution containing ~1.7g of MnSO<sub>4</sub>, ~2.5g of (NH<sub>4</sub>)<sub>2</sub>S<sub>2</sub>O<sub>8</sub> and 4 ml 1M HCl in 80 ml DI water for 12 h 140 °C. The percentage of product formation is 50% for  $\beta$ -MnO<sub>2</sub> as the reaction was performed in acidic environment. Moreover, the  $\beta$ -MnO<sub>2</sub> (1×1 tunnel) phase was formed in absence of K<sup>+</sup> ion as only four MnO<sub>6</sub> unit helped to form the tunnel. For  $\gamma$ -MnO<sub>2</sub>, ~3.5g MnSO<sub>4</sub>.H<sub>2</sub>O, ~4.5g of (NH<sub>4</sub>)<sub>2</sub>S<sub>2</sub>O<sub>8</sub> , and ~10 ml 1M HCl solution were dissolved in 80 ml of DI water and reacted at ~100°C for 24 h. Finally,  $\delta$ -MnO<sub>2</sub> was obtained by solvothermal method. About ~5 g of KMnO<sub>4</sub>, ~0.2 g and ~4.5 ml 1 M HCl reacted at ~120 °C for 6 h. A black colour powered sample was formed. The excess amount of K<sup>+</sup> ion favoured the formation of layered structure. Four different types of MnO<sub>2</sub>/MoS<sub>2</sub> heterostructure were prepared by solvothermal method. Typically, the required amount of different phase of MnO<sub>2</sub>, (NH<sub>4</sub>)<sub>6</sub>Mo<sub>7</sub>O<sub>24</sub>.4H<sub>2</sub>O, and CS(NH<sub>2</sub>)<sub>2</sub> were dissolved in 80 ml 1:1 ethanol-water mixture. The mixed solution was transformed in 100 ml Teflon lined stainless steel autoclave and kept inside a hot air oven at 180 °C for 18 h. The resultant products were filtered and dried at 60 °C. Pure MoS<sub>2</sub> was prepared by using (NH<sub>4</sub>)<sub>6</sub>Mo<sub>7</sub>O<sub>24</sub>.4H<sub>2</sub>O, and CS(NH<sub>2</sub>)<sub>2</sub> in 80 ml 1:1 ethanol-water solution through solvothermal method keeping it in Teflon lined stainless steel autoclave at 180 °C for 18 h.

### **Structural Characterization:**

X-ray diffraction (XRD) patterns of the heterostructures were recorded with D2 PHASER (Bruker, Germany) using Cu K $\alpha$  radiation ( $\lambda = 1.5418 \text{ \AA}$ ). The morphology of the prepared samples was characterized by field emission scanning electron microscopy (FE-SEM, Carl

Zeiss, Germany) at 5 kV, and the compositions of the samples were determined by an energy-dispersive X-ray (EDX) spectrometer associated with FE-SEM instrument. The High resolution Transmission electron microscopy (HR-TEM) was performed using JEM-2000 RXII at 15 and 200 kV to understand the microstructures of the prepared samples. The specimens of HR-TEM analysis were prepared by drop casting the dispersed solution (10 ml 99% ethanol) of the samples (0.001 g) in carbon-coated Cu grids followed by drying inside a vacuum oven for overnight. The chemical environment of the heterostructure was investigated by X-Ray photoelectron spectroscopy (XPS) Thermo Fisher Scientific Pvt. Ltd., UK. Gas chromatography (GC) was carried out by CHEMITO GC, make Thermo-Fisher with TCD Detector.

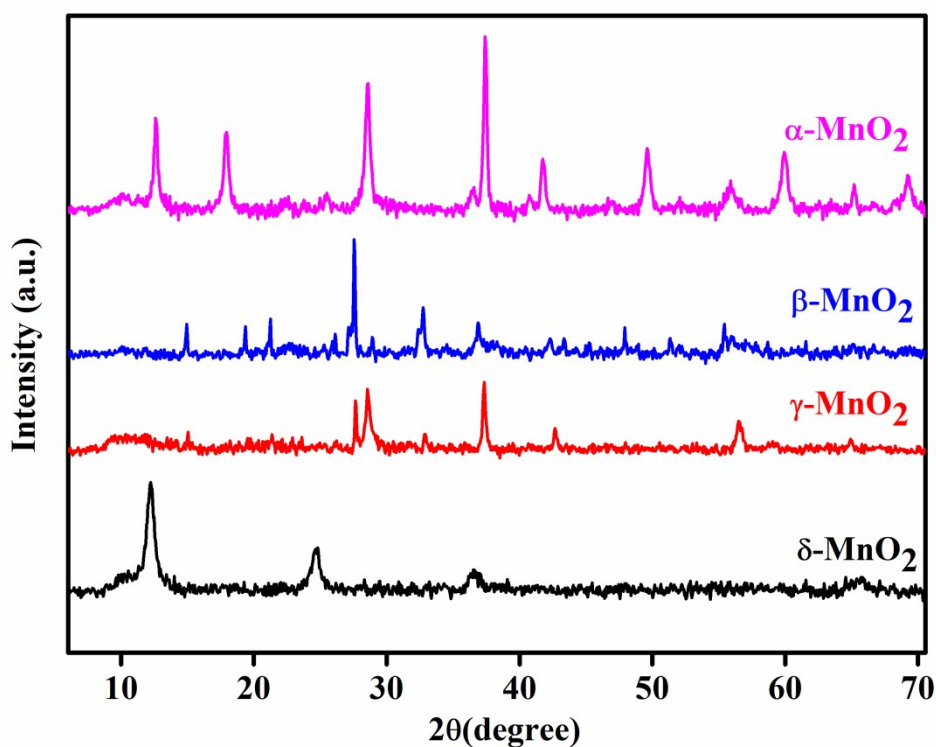

**Fig. S1:** XRD pattern of  $\alpha$ -MnO<sub>2</sub>,  $\beta$ -MnO<sub>2</sub>,  $\gamma$ -MnO<sub>2</sub>, and  $\delta$ -MnO<sub>2</sub>

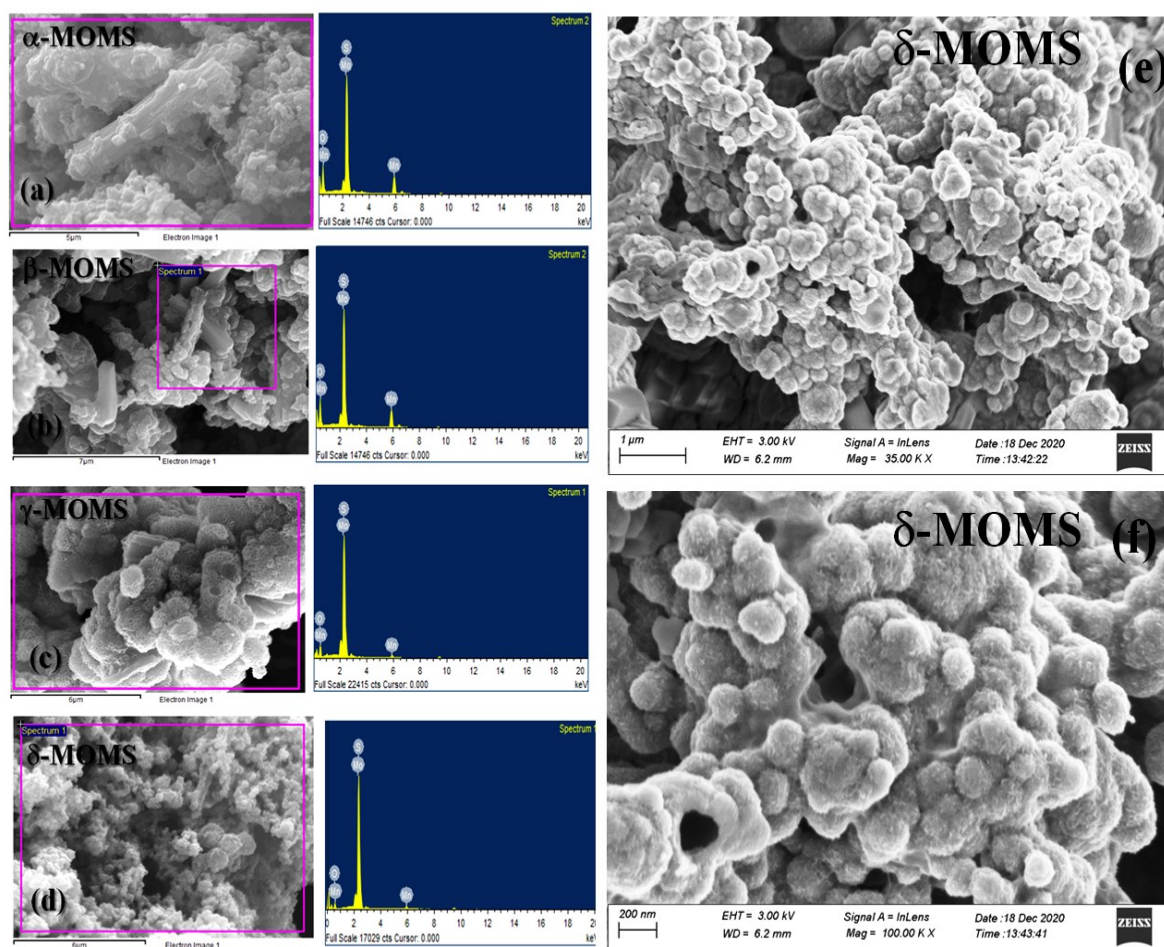

**Fig. S2:** EDX spectra of (a)  $\alpha$ -MOMS, (b)  $\beta$ -MOMS, (c)  $\gamma$ -MOMS, (d)  $\delta$ -MOMS, (e,f) FE-SEM image of  $\delta$ -MOMS at low (1  $\mu$ m) and high (200 nm) magnification.

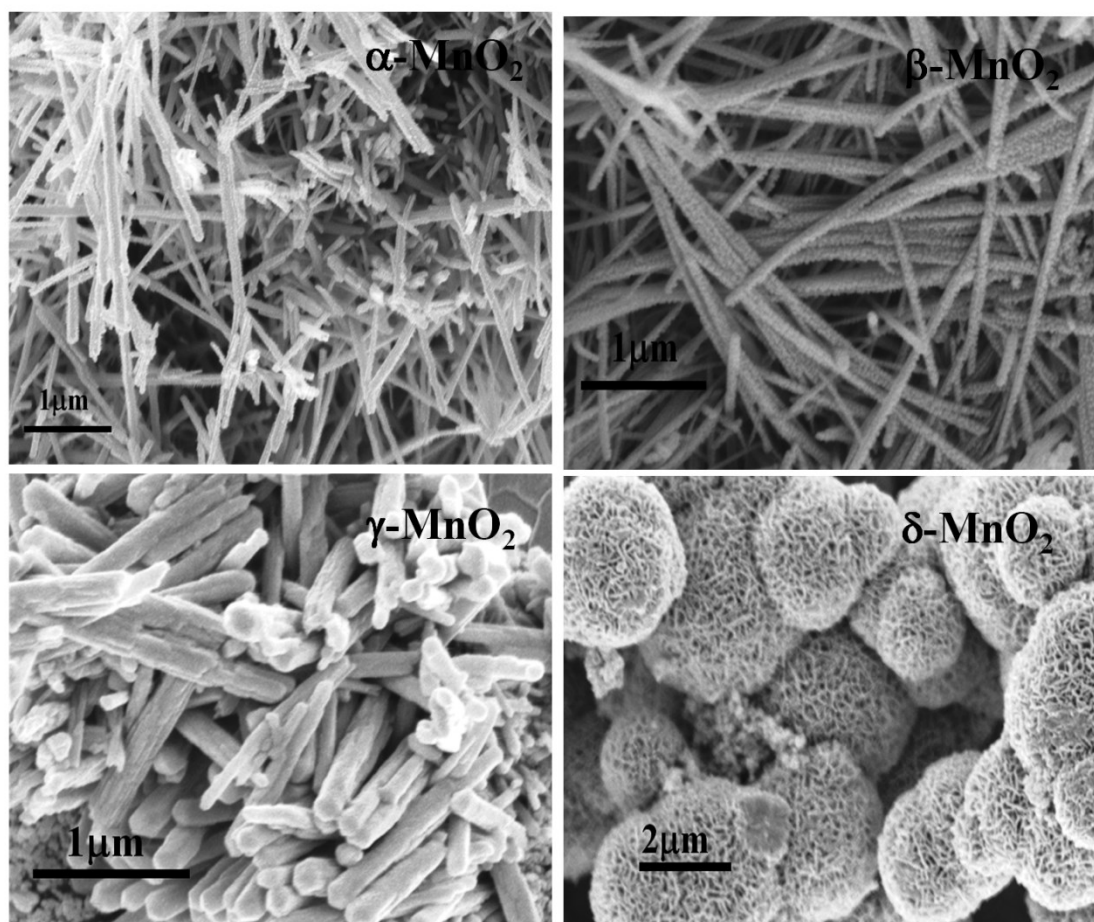

**Fig. S3:** FE-SEM image of (a)  $\alpha$ -  $\text{MnO}_2$ , (b)  $\beta$ - $\text{MnO}_2$ , (c)  $\gamma$ -  $\text{MnO}_2$ , (d)  $\delta$ - $\text{MnO}_2$ .

**Table1:** XPS results for  $\Delta E_{2p1/2}$ ,  $\Delta E_{3s}$  splitting, and AOS from binding energies (BE) for deconvoluted components of the O 1s region

| Samples                   | $\Delta E_{2p1/2}$ | $\Delta E_{3s}$ | AOS   |
|---------------------------|--------------------|-----------------|-------|
| $\alpha$ -MOMS            | 11.63              | 4.885           | 3.46  |
| $\beta$ -MOMS             | 10.47              | 4.503           | 3.68  |
| $\gamma$ -MOMS            | 10.80              | 4.82            | 3.67  |
| $\delta$ -MOMS            | 10.32              | 4.342           | 3.75  |
| $\alpha$ - $\text{MnO}_2$ | -                  | -               | 3.782 |
| $\delta$ - $\text{MnO}_2$ | -                  | -               | 3.793 |

The average oxidation state (AOS) of Mn is calculated from core level O1s spectra from XPS results by using the following equation, where  $I_{\text{Mn-O-Mn}}$  and  $I_{\text{Mn-OH}}$  represent the intensities of the respective component.<sup>2</sup>

All the XPS results (Mn2p, Mn3s, Mo3d, S2p, and O1s) were collected by considering C1s photoelectron line at ~284 eV as a reference. The obtained XPS data were analysed and deconvoluted using Casa XPS software.

$$\text{Average Oxidation State (AOS)} = \frac{4(I_{\text{Mn-O-Mn}} - I_{\text{Mn-OH}}) + 3 \times I_{\text{Mn-OH}}}{I_{\text{Mn-O-Mn}}}$$

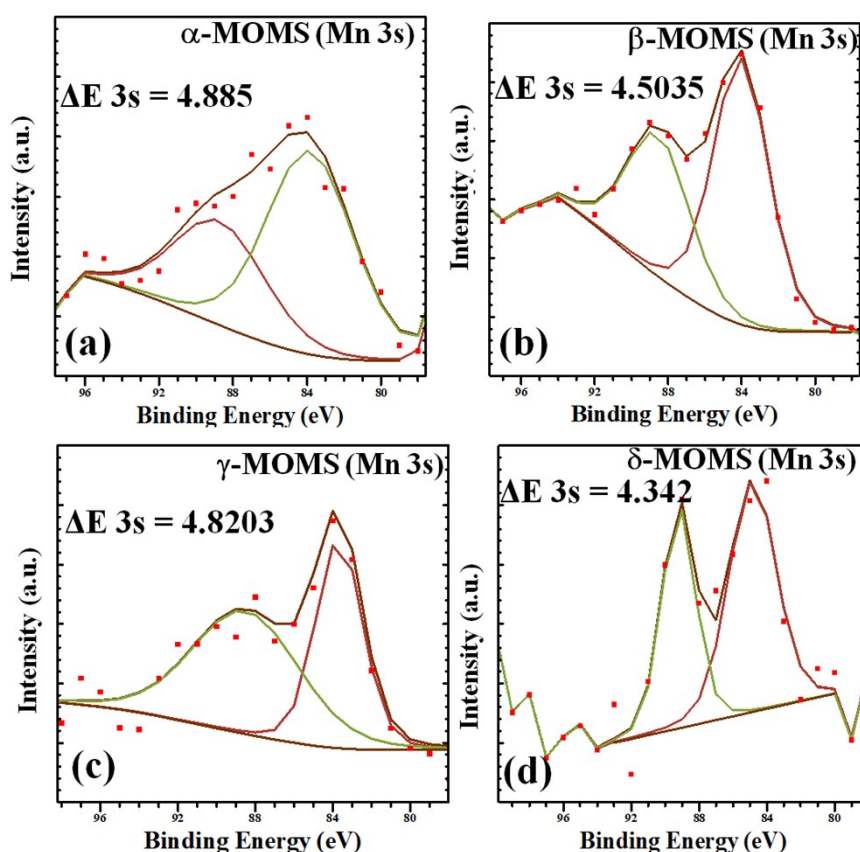

**Fig. S4:** XPS profile for Mn 3s (a)  $\alpha$ -MOMS, (b)  $\beta$ -MOMS, (c)  $\gamma$ -MOMS, and (d)  $\delta$ -MOMS

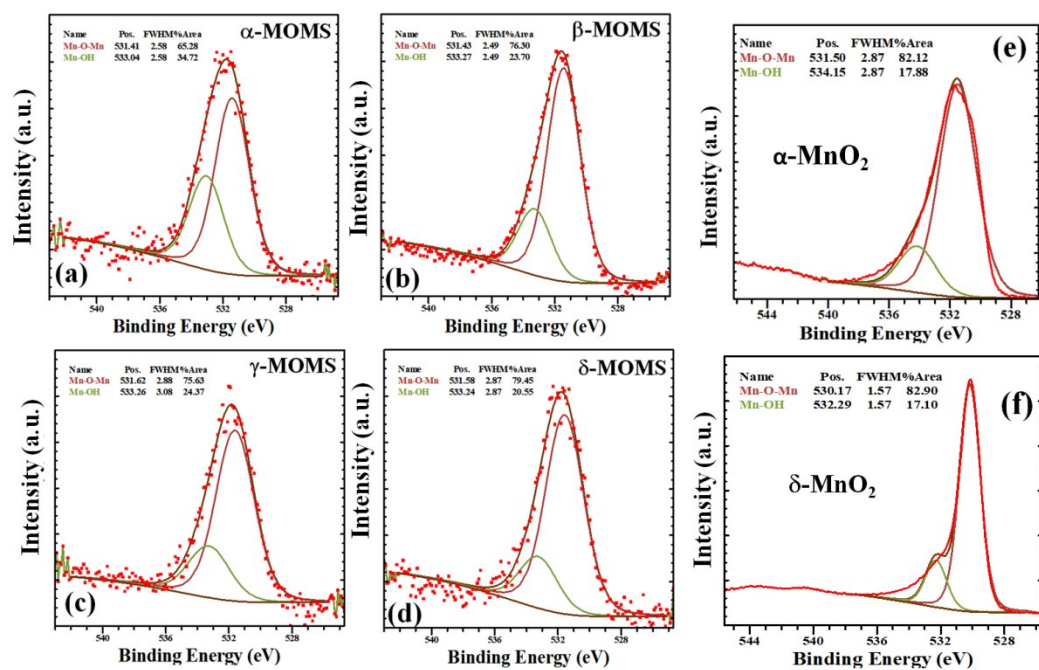

**Fig. S5:** XPS profile for O1s (a)  $\alpha$ -MOMS, (b)  $\beta$ -MOMS, (c)  $\gamma$ -MOMS, (d)  $\delta$ -MOMS, (e)  $\alpha$ -MnO<sub>2</sub>, and (f)  $\delta$ -MnO<sub>2</sub>.

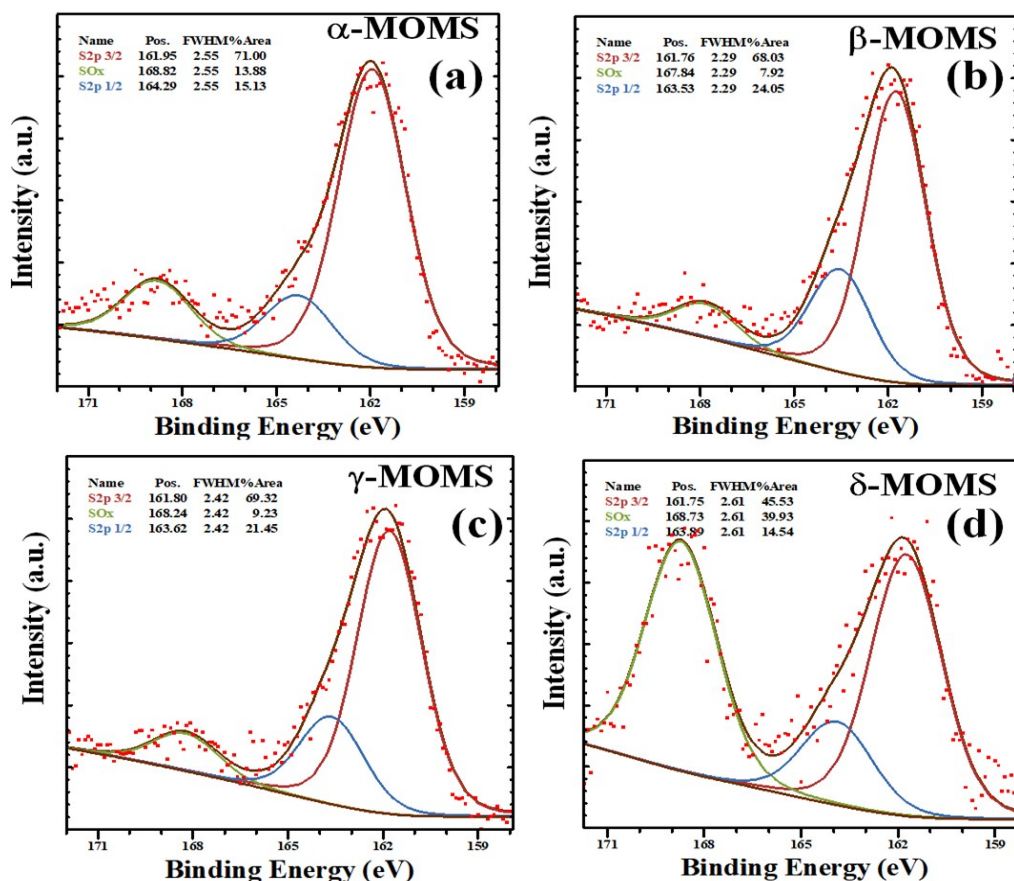

**Fig. S6:** XPS depth profile of S 2p (a) α-MOMS, (b) β-MOMS, (c) γ-MOMS, and (d) δ-MOMS

### Electrochemical Characterization:

All the electrochemical measurements were conducted at room temperature (298K) in PARSTAT 4000 (Princeton Applied Research USA) electrochemical workstation using acidic and alkaline medium. Graphite rod is used as working electrode with a surface area of 0.28 cm<sup>2</sup>. The catalyst ink was prepared by dispersing 5 mg of sample, PVDF (10 wt %), and carbon black (10 wt %) in 99% ethanol. The homogenous catalyst ink was drop-casted over working electrode at 0.5 mg per 1cm<sup>2</sup> area of electrode. Ag/AgCl (sat. KCl) and carbon counter electrode were used as reference and counter electrode respectively. All the electrochemical tests were performed in 0.5 M H<sub>2</sub>SO<sub>4</sub> and 1M KOH solution. 10 wt % Pt/C was drop-casted over working electrode (graphite rod) to use as state-of-the-art material in both acidic and alkaline medium.

In three electrode set up Ag/AgCl (sat. KCl) and carbon rod were used as reference and counter electrode to record linear sweep voltammetry (LSV), cyclic voltammetry (CV), electrochemical impedance spectroscopy (EIS), and chronoamperometry of the prepared samples. The potential is transferred to reference hydrogen electrode by the following equation:

$$E_{\text{RHE}} = E_{\text{Ag/AgCl(sat. KCl)}} + 0.059\text{pH} + 0.197$$

Linear sweep voltammetry was recorded at scan rate of 5 mV s<sup>-1</sup> to neglect the electrical double layer charging current. The current density in polarization curve was obtained by dividing the current response with the geometric area of the working electrode (0.28 cm<sup>2</sup>). The influence uncompensated resistance was eliminated by 100% iR correction. The recorded overpotential for HER and OER were calculated from the following equation:<sup>4</sup>

$$|\eta_{\text{HER}}| = 0 - E_{\text{RHE}} - iR$$

$$|\eta_{\text{OER}}| = 1.23 - E_{\text{RHE}} - iR$$

The Tafel slope values were obtained from the Tafel plot by using the following mathematical equation:<sup>4-5</sup>

$$\eta = a + b \log j$$

Where,  $\eta$ ,  $b$ , and  $j$  are the overpotential, Tafel slope and current density of the respective Tafel equation. Electrochemical Impedance spectroscopy (EIS) was conducted at fixed external DC potential bias within AC frequency range of 0.1 to 10<sup>5</sup> Hz to understand the electrode-electrolyte kinetics. Z view® software (Scribner Associates Inc USA) was used to fit the EIS data with the help of the Randles equivalent circuit model.

Electrochemical active surface area and roughness factor were calculated from the electrical double layer capacitance ( $C_{dl}$ ), specific capacitance ( $C_s$ ) and geometric area of the working electrode using the following equation:<sup>4-6</sup>

$$ECSA = C_{dl}/C_s$$

$$RF = ECSA / \text{Geometric area of the working electrode}$$

The  $C_{dl}$  values were calculated from the cyclic voltammetry plot recorded in faradic region at different scan rate. The specific capacitance of the atomically smooth planer surface of the working electrode is considered to be  $35 \mu F cm^{-2}$ .<sup>3,4</sup> Chronoamperometry was performed to check the long term stability of the electrode. Before chronoamperometry study, 10000 CV were performed at a scan rate  $100 mVs^{-1}$  within a specific potential window. The relationship between the Tafel slope with the rate determining step (RDS) and the surface coverage of the electrode during the HER process has been analysed to understand the experiment kinetic results. The HER process of the prepared samples is likely to follow three different types of mechanistic pathway:<sup>4</sup>

**Volmer Pathway:**  $E_{surfcae} + H_2O + e^- \rightarrow E_{surface}-H_{ads} + OH^-$  (electrochemical adsorption)

**Heyrovsky Pathway:**  $H_{ads} + H_2O + e^- \rightarrow E_{surfcae} + H_2 (g) + OH^-$  (electrochemical desorption)

**Tafel Pathway:**  $2E_{surfcae}-H_{ads} \rightarrow 2E_{surfcae} + H_2 (g)$  (chemical desorption)

The 1<sup>st</sup> step two in the HER process is the initial adsorption on the heterostructure surface. In 2<sup>nd</sup> Electrochemical desorption step the solvated H get attached with the adsorbed H atoms and resulting the formation of  $H_2$ . Both the reaction rates are potential dependent. The Tafel slope values assist to find out the rate determining step occurring in the electrode surface for HER.

For OER process over the heterostructure active sites are followed through two possible mechanisms namely conventional OER and lattice oxygen evolution reaction (LOER) which is progress concurrently. Binniger et al proposed OER mechanism at the metal oxide surface in alkaline medium consist of following steps:<sup>5,6</sup>

**Conventional OER:**

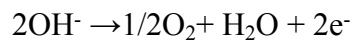

**Chemical dissolution at the heterostructure surface:**

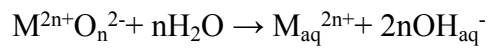

**Lattice Oxygen Evolution Reaction:**

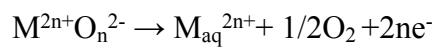

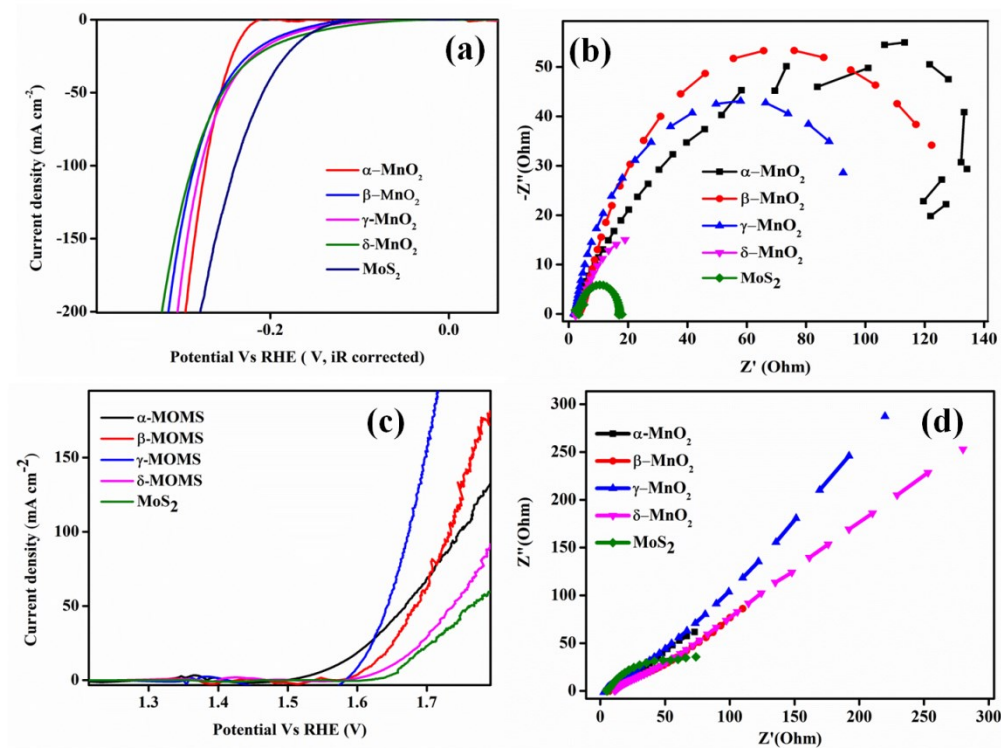

**Fig. S7:** (a,c) polarization curve for HER and OER process of different polymorphous structure of MnO<sub>2</sub> and MoS<sub>2</sub>; (b, c) EIS plot for HER and OER process of different polymorphous structure of MnO<sub>2</sub> and MoS<sub>2</sub> in 250 mV overpotential

**Table S2:** Polarization results for OER and HER of the  $\alpha$ -MnO<sub>2</sub>,  $\beta$ -MnO<sub>2</sub>,  $\gamma$ -MnO<sub>2</sub>,  $\delta$ -MnO<sub>2</sub>, and MoS<sub>2</sub>

| Material                   | Overpotential @current density |                                  |
|----------------------------|--------------------------------|----------------------------------|
|                            | OER                            | HER                              |
| $\alpha$ -MnO <sub>2</sub> | 340 mV@10 mA cm <sup>-2</sup>  | 230 mV@10 mA cm <sup>-2</sup>    |
| $\beta$ -MnO <sub>2</sub>  | 380 mV@10 mA cm <sup>-2</sup>  | 189.18 mV@10 mA cm <sup>-2</sup> |
| $\gamma$ -MnO <sub>2</sub> | 370 mV@10 mA cm <sup>-2</sup>  | 184.68 mV@10 mA cm <sup>-2</sup> |
| $\delta$ -MnO <sub>2</sub> | 420 mV@10 mA cm <sup>-2</sup>  | 170.03 mV@10 mA cm <sup>-2</sup> |
| MoS <sub>2</sub>           | 430 mV@10 mA cm <sup>-2</sup>  | 158.76 mV@10 mA cm <sup>-2</sup> |

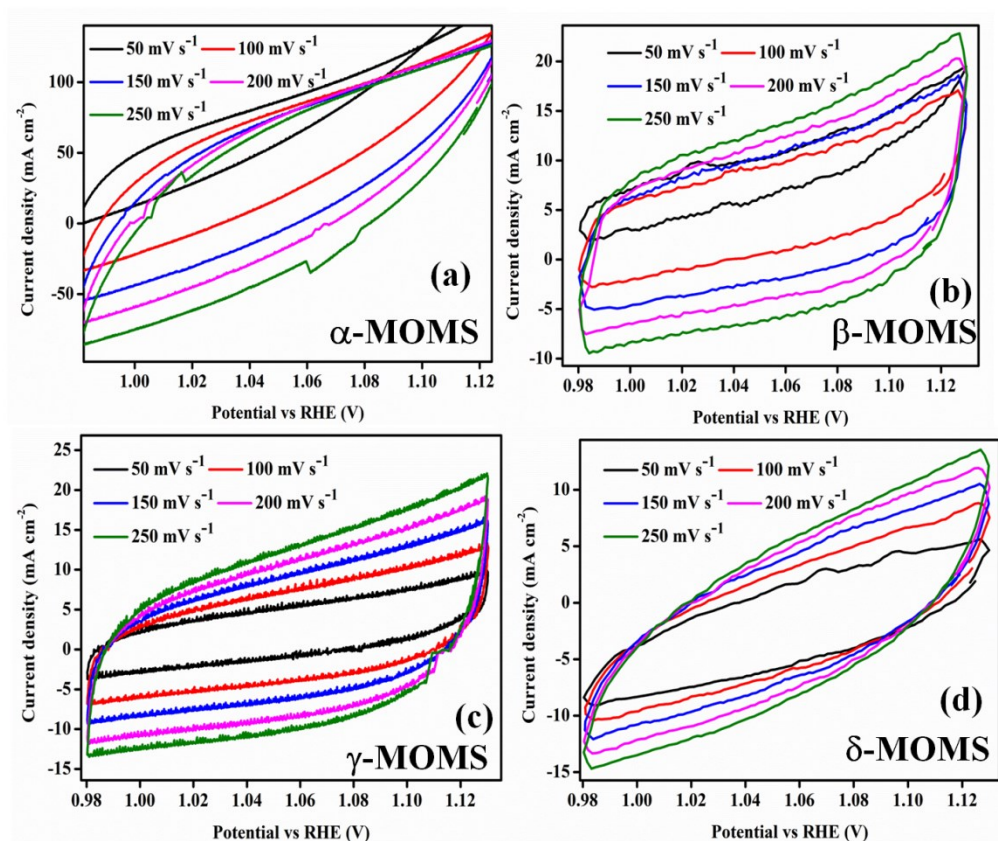

**Fig. S8:** Representation of the Cyclic Voltammetry curves for (a)  $\alpha$ -MOMS, (b)  $\beta$ -MOMS, (c)  $\gamma$ -MOMS, and (d)  $\delta$ -MOMS at different scan rates (50, 100, 150, 200, 250 mV s<sup>-1</sup>) for OER [without iR correction]

#### Faradaic Efficiency (FE) calculation OER for $\alpha$ -MOMS:

The current density at 1.5 V (vs RHE) potential = 23 mA cm<sup>-2</sup>

The measured geometric area of the electrode = 5 cm<sup>2</sup>

Charge passed in unit second = (0.023 × 5 × 1) Coulomb = 0.115 coulomb

Again, 0.115 coulomb = (0.115/96485) mole of electron

Oxygen produced per second = (0.115/(96485 × 4)) mole, as 4 electrons are involved to produce one oxygen molecule

$$= (0.115 \times 22400) / (96485 \times 4) \text{ mL}$$

$$= 0.0067 \text{ mL (1 mole gas} = 22400 \text{ mL at STP)}$$

The amount of the O<sub>2</sub> evolve was measured from the water displacement in a marked collection tube. The area of the electrodes ( $\alpha$ -MOMS) in the setup was kept high so that large amount of gas could evolve. The Faradic Efficiency (FE) at 1.5 V (RHE) potential was calculated using the following equation.

$$\text{FE} = (\text{Amount of O}_2 \text{ evolved (mL)} \times 100) / \text{Theoretically calculated O}_2 \text{ (mL)}$$

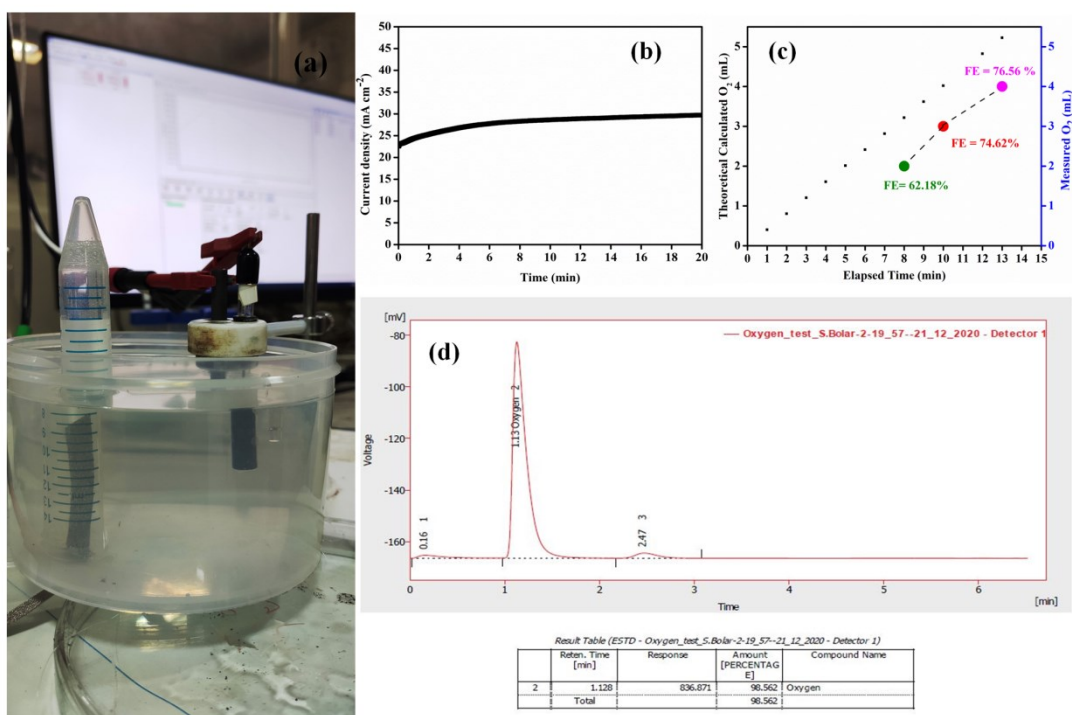

Fig. S9: (a) Fabricated setup for calculating the Faradaic efficiency of OER process splitting; (b) chronoamperometric curve for  $\alpha$ -MOMS at 1.5 V (vs RHE) potential; (c) theoretically calculated and measured amount of the evolved O<sub>2</sub>, (d) Gas chromatographic data of the collected O<sub>2</sub> from OER process at a 1.5 V (Vs RHE)

**Table S3.** Collected data for OER in 1M KOH

| Catalyst                                                                        | Electrolyte | Overpotential<br>(mV)<br>@current<br>density (mA cm <sup>-2</sup> ) | Tafel Slope<br>(mV dec <sup>-1</sup> ) | Reference                                         |
|---------------------------------------------------------------------------------|-------------|---------------------------------------------------------------------|----------------------------------------|---------------------------------------------------|
| <b><math>\alpha</math>-MOMS</b>                                                 | 1 M KOH     | 260@10 mA cm <sup>-2</sup>                                          | 107                                    | Present work                                      |
| <b>MnCo<sub>2</sub>S<sub>4</sub></b>                                            | 1 M KOH     | 325 @50 mA cm <sup>-2</sup>                                         | 115                                    | J. Mater. Chem. A, 2017, 5, 17211-17215           |
| <b><math>\alpha</math>-MnS</b>                                                  | 1 M KOH     | 292@10 mA cm <sup>-2</sup>                                          | 70                                     | J. Mater. Chem. A, 2020,8, 3901-3909              |
| <b>Mn<sub>3</sub>O<sub>4</sub>/CoSe</b>                                         | 0.1 M KOH   | 450@10 mA cm <sup>-2</sup>                                          | 49                                     | J. Am. Chem. Soc. 2012, 134, 6, 2930–2933         |
| <b><sup>2</sup>(Fe,Co,Ni)-MnO<sub>2</sub>@carbon paper ultrathin nanosheets</b> | 1 M KOH     | 390@20 mA cm <sup>-2</sup>                                          | 104.4                                  | Adv. Funct. Mater., 2017, 27, 1704083             |
| <b>NiO/MnO<sub>2</sub>@PANI</b>                                                 | 0.1 M KOH   | 750@10 mA cm <sup>-2</sup>                                          | 42                                     | ACS Appl. Mater. Interfaces, 2017, 9, 42676-42687 |
| <b>Co<sub>3</sub>S<sub>4</sub>@MoS<sub>2</sub></b>                              | 1 M KOH     | 330@10 mA cm <sup>-2</sup>                                          | 59                                     | Chem. Mater. 2017, 29, 5566–5573                  |
| <b>Co<sub>9</sub>S<sub>8</sub>@MoS<sub>2</sub>/CNFs</b>                         | 1 M KOH     | 430@10 mA cm <sup>-2</sup>                                          | 61                                     | Adv. Mater. 2015, 27, 4752–4759.                  |
| <b>MnO<sub>2</sub>/NiCo<sub>2</sub>O<sub>4</sub>/NF</b>                         | 1 M KOH     | 340@10 mA cm <sup>-2</sup>                                          | 139                                    | J alloy compd 719 (2017) 314e321                  |
| <b>Doped MnO<sub>2</sub> ultrathin nanosheets</b>                               | 1 M KOH     | 390@20 mA cm <sup>-2</sup>                                          | 104.4                                  | Adv. Funct. Mater. 2017, 1704083                  |
| <b>MnO<sub>2</sub>-CoP<sub>3</sub> nanowires</b>                                | 1 M KOH     | 288@10 mA cm <sup>-2</sup>                                          | 64                                     | Electrochem. commun, 86, 161-165, 2018            |
| <b>MnO<sub>2</sub>@mpg-C<sub>3</sub>N<sub>4</sub></b>                           | 1 M KOH     | 480@1 mA cm <sup>-2</sup>                                           | 90                                     | Int. J. Hydrog. Energy, 44, 2019, 17995-18006     |
| <b>Co<sub>3</sub>O<sub>4</sub>/MoS<sub>2</sub></b>                              | 1M KOH      | 230@1 mA cm <sup>-2</sup>                                           | 45                                     | Appl. Catal. B, 248, 2019, 202-210                |

**Table S4.** Electrical resistivity values of heterostructure derived from EIS analysis for OER

| Catalyst                        | R <sub>s</sub> (Ω) | R <sub>Ct</sub> (Ω) |
|---------------------------------|--------------------|---------------------|
| <b><math>\alpha</math>-MOMS</b> | 2.004              | 15.8                |
| <b><math>\beta</math>-MOMS</b>  | 2029               | 95                  |
| <b><math>\gamma</math>-MOMS</b> | 2.022              | 35.43               |
| <b><math>\delta</math>-MOMS</b> | 2.021              | 165                 |

**Table S5.** Calculated double-layer capacitance ( $C_{dl}$ ), electrochemically active Surface area (ECSA) and roughness factor (RF) values in OER

| Catalyst       | $C_{dl}$ (mF cm <sup>-2</sup> ) | ECSA (cm <sup>2</sup> )<br>(digit after point neglected) | RF<br>(digit after point neglected) |
|----------------|---------------------------------|----------------------------------------------------------|-------------------------------------|
| $\alpha$ -MOMS | 203                             | 5800                                                     | 64444.44                            |
| $\beta$ -MOMS  | 38.5                            | 1100                                                     | 12222.22                            |
| $\gamma$ -MOMS | 41.6                            | 1188.57                                                  | 13206.33                            |
| $\delta$ -MOMS | 17.79                           | 508.28                                                   | 5644.44                             |

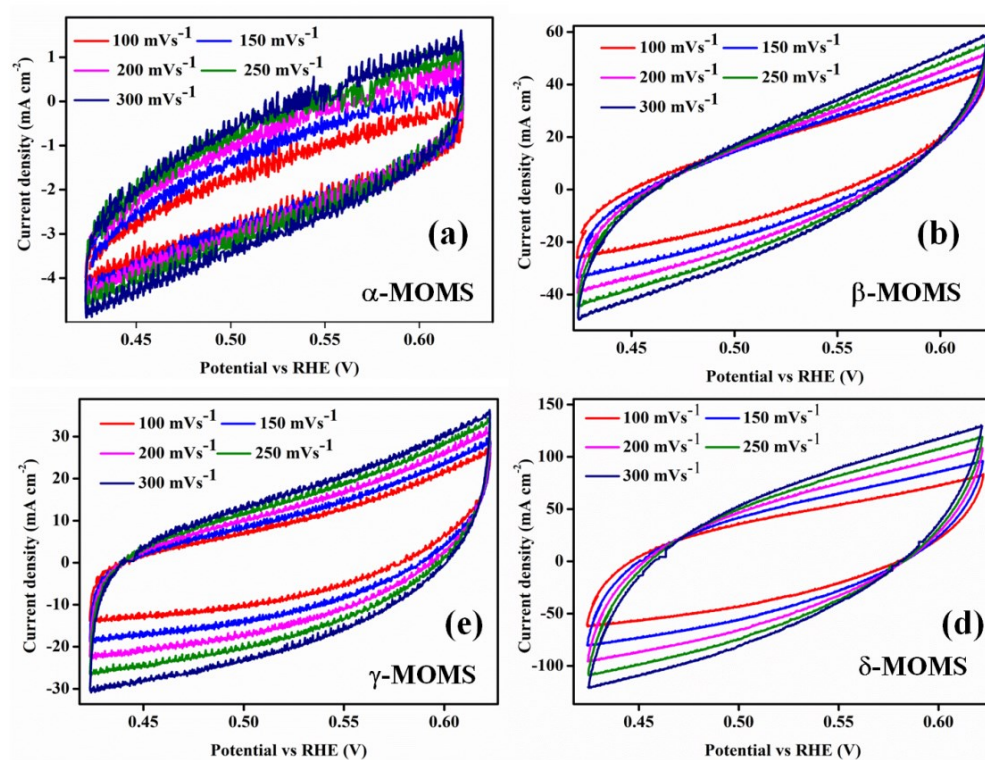

**Fig. S10:** Representation of the Cyclic Voltammetry curves for (a)  $\alpha$ -MOMS, (b)  $\beta$ -MOMS, (c)  $\gamma$ -MOMS, and (d)  $\delta$ -MOMS at different scan rates (50, 100, 150, 200, 250 mV s<sup>-1</sup>) for HER [without iR correction]

**Faradaic Efficiency (FE) calculation HER for  $\delta$ -MOMS:**

The current density at - 0.191 mV (vs RHE) potential = 25 mA cm<sup>-2</sup>

The measured geometric area of the electrode = 5 cm<sup>2</sup>

Charge passed in unit second = (0.025×5×1) Coulomb = 0.125 coulomb

Again, 0.125 coulomb = (0.125/96485) mole of electron

Hydrogen produced per second = (0.125/(96485×2)) mole, as 2 electrons are involved to produce one hydrogen molecule

$$= (0.125 \times 22400) / (96485 \times 2) \text{ mL}$$

$$= 0.0145 \text{ mL (1 mole gas = 22400 mL at STP)}$$

The amount of the H<sub>2</sub> evolved was measured from the water displacement in a marked collection tube. The area of the electrodes ( $\delta$ -MOMS) in the setup was kept high so that large amount of gas could evolve. The Faradic Efficiency (FE) was calculated using the following equation.

$$\text{FE} = (\text{Amount of H}_2 \text{ evolved (mL)} \times 100) / \text{Theoretically calculated H}_2 \text{ (mL)}$$

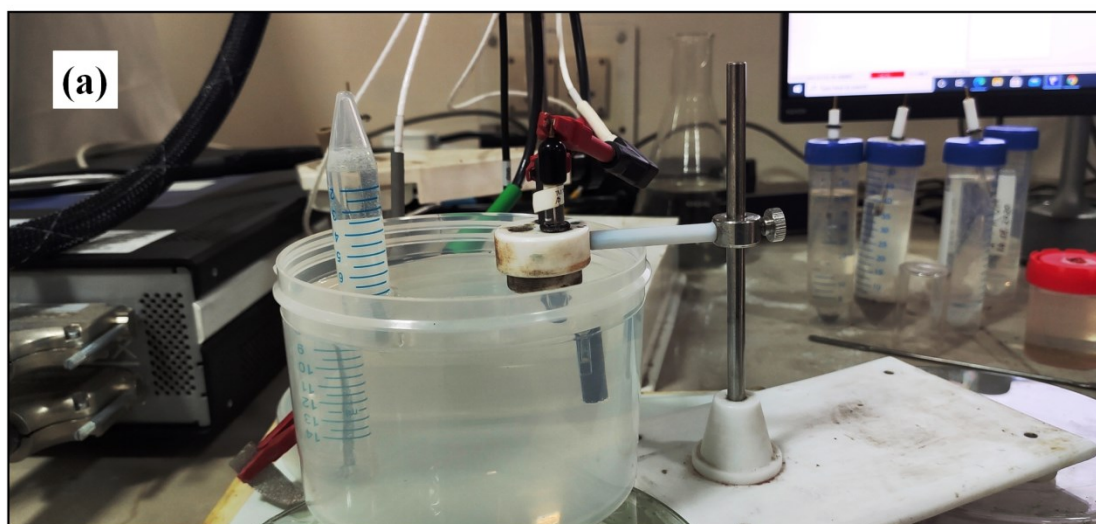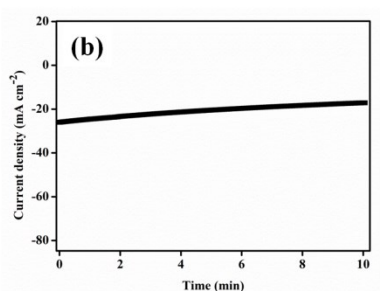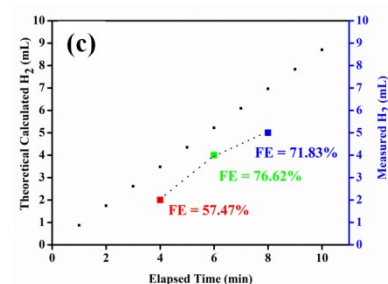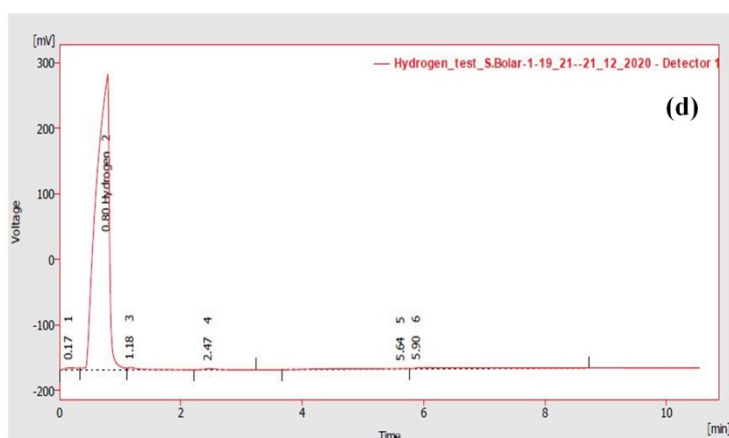

Result Table (ESTD - Hydrogen\_test\_S.Bolar-1-19\_21--21\_12\_2020 - Detector 1)

| Reten. Time [min] | Response | Amount [PERCENTAGE] | Compound Name |
|-------------------|----------|---------------------|---------------|
| 2                 | 0.796    | 6690.251            | Hydrogen      |
| Total             |          | 95.251              |               |

Fig. S11: (a) Fabricated setup for calculating the Faradaic efficiency of HER process; (b) chronoamperometric curve for  $\delta$ -MOMS at -0.191 V (vs RHE) potential; (c) theoretically calculated and measured amount of the evolved  $H_2$ , (d) Gas chromatographic data of the collected  $H_2$  from HER process at -0.191 V (Vs RHE)

**Table S6.** Collected data for HER in 1M KOH

| Catalyst                                                                | Synthetic Method             | Overpotential (mV) @current density (mA cm <sup>-2</sup> ) | Tafel Slope (mV dec <sup>-1</sup> ) | Reference                                  |
|-------------------------------------------------------------------------|------------------------------|------------------------------------------------------------|-------------------------------------|--------------------------------------------|
| <b>δ-MOMS</b>                                                           | Two step solvothermal        | 133@10 mA cm <sup>-2</sup>                                 | 77                                  | Present Work                               |
| <b>Doped-MoSe<sub>2</sub> Nanoflakes/3d Metal Oxide–Hydr(Oxy)Oxides</b> | Sonication                   | 81@10 mA cm <sup>-2</sup>                                  | -                                   | Adv. Energy Mater., 2018, 28, 278, 1801764 |
| <b>CoSe<sub>2</sub>/MoSe<sub>2</sub></b>                                | Hydrothermal Method          | 218@10 mA cm <sup>-2</sup>                                 | 76                                  | Chem. - Eur. J., 2018, 24, 43, 11158-11165 |
| <b>MoS<sub>2</sub>/Ni<sub>3</sub>S<sub>2</sub></b>                      | Solvotheramal Method         | 110@10 mA cm <sup>-2</sup>                                 | 83.1                                | Angew. Chem. Int. Ed. 2016, 55, 6702– 6707 |
| <b>CoS<sub>x</sub>/MoS<sub>2</sub> chalcogels</b>                       | Solution mixing              | 210@5 mA cm <sup>-2</sup>                                  | -                                   | Nature Materials, 2015, 15, 2, 197– 203.   |
| <b>MoS<sub>2</sub>-Ni<sub>3</sub>S<sub>2</sub> HNRs/NF</b>              | Solvothermal                 | 98@10 mA cm <sup>-2</sup>                                  | 61                                  | ACS Catal., 2017, 7, 2357-2366             |
| <b>Co9S8@MoS2/CNFs</b>                                                  | NA                           | 190@10 mA cm <sup>-2</sup>                                 | 110                                 | Adv. Mater. 2015, 27, 4752–4759.           |
| <b>CoS–Co(OH)<sub>2</sub>@MoS<sub>2+x</sub></b>                         | Refluxing                    | 140@10 mA cm <sup>-2</sup>                                 | 68                                  | Adv. Funct. Mater. 2016, 26, 7386–7393     |
| <b>Cu<sub>2</sub>O@MnO<sub>2</sub></b>                                  | Annealing                    | 132@10 mA cm <sup>-2</sup>                                 | 232                                 | Nano Research, 2018, 11, 1798-1809         |
| <b>δ-MnO<sub>2</sub>/SGS</b>                                            |                              | 80@10 mA cm <sup>-2</sup>                                  | 42                                  | Electrochimica Acta, 2019, 296, 235e242    |
| <b>Co<sub>3</sub>O<sub>4</sub>/MoS<sub>2</sub></b>                      | Hydrothermal and calcination | 205@10 mA cm <sup>-2</sup>                                 | 98                                  | Appl. Catal. B, 2019, 248, 202-210         |

**Table S7.** Electrical resistivity values of heterostructure derived from EIS analysis for HER

| Catalyst       | $R_s (\Omega)$ | $R_{ct} (\Omega)$ |
|----------------|----------------|-------------------|
| $\alpha$ -MOMS | 2.2            | 15.39             |
| $\beta$ -MOMS  | 1.3            | 8.04              |
| $\gamma$ -MOMS | 1.646          | 6.587             |
| $\delta$ -MOMS | 1.78           | 4.695             |

**Table S8.** Calculated double-layer capacitance ( $C_{dl}$ ), electrochemically active Surface area (ECSA) and roughness factor (RF) values in HER

| Catalyst       | $C_{dl} (mF\ cm^{-2})$ | ECSA ( $cm^2$ )<br>(digit after point<br>neglected) | RF<br>(digit after point<br>neglected) |
|----------------|------------------------|-----------------------------------------------------|----------------------------------------|
| $\alpha$ -MOMS | 3.15                   | 90                                                  | 1500                                   |
| $\beta$ -MOMS  | 47.52                  | 1357.71                                             | 22628.5                                |
| $\gamma$ -MOMS | 41.6                   | 1188.57                                             | 19809.5                                |
| $\delta$ -MOMS | 94.19                  | 2691.14                                             | 44852.33                               |

**Table 9:** Comparative table of some bifunctional catalysts and their performances in overall water splitting in alkaline medium

| Electrocatalytic System                                                                             | Medium  | Overpotential@10 mA cm <sup>-2</sup> | References                                       |
|-----------------------------------------------------------------------------------------------------|---------|--------------------------------------|--------------------------------------------------|
| NiCo <sub>2</sub> O <sub>4</sub>   NiCo <sub>2</sub> O <sub>4</sub>                                 | 1M NaOH | 1.65 V                               | Angew Chem Int Ed Engl. 2016, 55, 21, 6290-4     |
| CoNi-OOH  CoNi-OOH                                                                                  | 1 M KOH | 1.67 V                               | Electrochim. Acta., 2019, 301, 449-457           |
| CoS <sub>x</sub> @MoS <sub>2</sub>   CoS <sub>x</sub> @MoS <sub>2</sub>                             | 1 M KOH | 1.668 V                              | ChemElectroChem, 2019, 6, 2, 430-438             |
| Co <sub>9</sub> S <sub>8</sub> @MoS <sub>2</sub>   Co <sub>9</sub> S <sub>8</sub> @MoS <sub>2</sub> | 1 M KOH | 1.67 V                               | ACS Appl. Mater. Interfaces 2018, 10, 1678–1689. |
| NiCo <sub>2</sub> S <sub>4</sub>   NiCo <sub>2</sub> S <sub>4</sub>                                 | 1 M KOH | 1.63 V                               | Adv. Funct. Mater. 2016, 26, 4661–4672.          |
| MoS <sub>2</sub> /Ni <sub>3</sub> S <sub>2</sub>   MoS <sub>2</sub> /Ni <sub>3</sub> S <sub>2</sub> | 1 M KOH | 1.57 V                               | Angew. Chem. Int. Ed., 2016, 55, 6702-6707       |
| Co/β-Mo <sub>2</sub> C@N-CNTs  Co/β-Mo <sub>2</sub> C@N-CNTs                                        | 1 M KOH | 1.64 V                               | Angew. Chem. Int. Ed., 2019, 58, 4923-4928       |
| N-NiMoO <sub>4</sub> /NiS <sub>2</sub>   N-NiMoO <sub>4</sub> /NiS <sub>2</sub>                     | 1 M KOH | 1.6 V                                | Adv. Funct. Mater., 2019, 29, 1805298            |
| Co-MoS <sub>2</sub> /BCCF  Co-MoS <sub>2</sub> /BCCF                                                | 1 M KOH | 1.55 V                               | Adv. Mater., 2018, 30, 1801450                   |
| CoMnO@CN  CoMnO@CN                                                                                  | 1 M KOH | 1.5 V                                | J. Am. Chem. Soc., 2015, 137, 14305-14312.       |
| α-MOMS  δ-MOMS                                                                                      | 1M KOH  | 1.623 V                              | This Work                                        |

## References:

- 1 P. Samanta, S. Ghosh, P. Samanta, N. C. Murmu, T. Kuila, *Alteration in capacitive performance of Sn-decorated MnO<sub>2</sub> with different crystal structure: An investigation towards the development of high-performance supercapacitor electrode materials*, J. Energy Storage, 2020, **28**, 101281.
- 2 Y. Meng, W. Song, H. Huang, Z. Ren, S. Y. Chen, S. L. Suib, *Structure–Property Relationship of Bifunctional MnO<sub>2</sub> Nanostructures: Highly Efficient, Ultra-Stable*

*Electrochemical Water Oxidation and Oxygen Reduction Reaction Catalysts Identified in Alkaline Media*, J. Am. Chem. Soc., 2014, **136**, 11452–11464

- 3 C. C. L. McCrory, S. Jung, I. M. Ferrer, S. M. Chatman, J. C. Peters, T. F. Jaramillo, *Benchmarking Hydrogen Evolving Reaction and Oxygen Evolving Reaction Electrocatalysts for Solar Water Splitting Devices*, J. Am. Chem. Soc., 2005, **137**, 4347.
- 4 S. Bolar, S. Shit, J. S. Kumar, N. C. Murmu, R. S. Ganesh, H. Inokawa, T. Kuila, *Optimization of active surface area of flower like MoS<sub>2</sub> using V-doping towards enhanced hydrogen evolution reaction in acidic and basic medium*, Appl. Catal., B. 2019, 254, 432
- 5 E. Fabbri, T. J. Schmidt, *Oxygen Evolution Reaction-The Enigma in Water Electrolysis*, ACS Catal. 2018, **8**, 9765–9774.
- 6 T. Binninger, R. Mohamed, K. Waltar, E. Fabbri, P. Levecque, R. Kötz, T. J Schmidt, *Thermodynamic explanation of the universal correlation between oxygen evolution activity and corrosion of oxide catalysts*, Sci Rep, 2015, **16**, 12167.
